# Supplementary material
Source: publisher site journal article supplement (https://www.dovepress.com/article/467570)
Supplement: Supplementary file 1 [file get_supplementary_file.php]

Supplementary Table 1: Standard Chinese Eye Exercises assessment form

Part I Press and knead cuanzhu (8 points)

|  | **Item** | **Score** | |
| --- | --- | --- | --- |
| Manipulation | Manipulate with thumb | Yes（1 point） | No（0 point） |
| Manipulate with fingertip | Yes（1 point） | No（0 point） |
| Manipulate in pressing and kneading | Yes（1 point） | No（0 point） |
| Manipulation diameter≦2 fingertip | Yes（1 point） | No（0 point） |
| Acupoint  Location | In the depression of the brow | Yes（1 point） | No（0 point） |
| In the supraorbital notch | Yes（1 point） | No（0 point） |
| Strength  Effectiveness | Sense of sore (Qi) | Yes（1 point） | No（0 point） |
| Rhythm | One movement in a beat | Yes（1 point） | No（0 point） |

Part II Press and nip jingming (8 points)

|  | **Item** | **Score** |
| --- | --- | --- |

| Manipulation | Manipulate with index  finger | Yes（1 point） | No（0 point） |
| --- | --- | --- | --- |
| Manipulate with fingertip | Yes（1 point） | No（0 point） |
| Manipulate in pressing and nipping | Yes（1 point） | No（0 point） |
| Manipulation diameter≦2 fingertip | Yes（1 point） | No（0 point） |
| Acupoint  Location | In the depression slightly above the inner canthus | Yes（1 point） | No（0 point） |
| Nip bone instead of skin | Yes（1 point） | No（0 point） |
| Strength  Effectiveness | Sense of sore (Qi) | Yes（1 point） | No（0 point） |
| Rhythm | One movement in a beat | Yes（1 point） | No（0 point） |

Part III Press and knead sibai (8 points)

|  | **Item** | **Score** | |
| --- | --- | --- | --- |
| Manipulation | Manipulate with index  finger | Yes（1 point） | No（0 point） |
| Manipulate with fingertip | Yes（1 point） | No（0 point） |
| Manipulation diameter≦2 fingertip | Yes（1 point） | No（0 point） |
| Manipulate in pressing and kneading | Yes（1 point） | No（0 point） |
| Acupoint  Location | Directly below the pupil | Yes（1 point） | No（0 point） |
| In the depression of the infraorbital foramen | Yes（1 point） | No（0 point） |
| Strength  Effectiveness | Sense of sore (Qi) | Yes（1 point） | No（0 point） |
| Rhythm | One movement in a beat | Yes（1 point） | No（0 point） |

Part IV Press and knead taiyang ,scrape orbit (14 points)

|  |  | **Item** | **Score** | |
| --- | --- | --- | --- | --- |
| Press  and  Knead  taiyang | Manipulation | Manipulate with thumb | Yes（1 point） | No（0 point） |
| Manipulate with fingertip | Yes（1 point） | No（0 point） |
| Manipulate in pressing and kneading | Yes（1 point） | No（0 point） |
| Manipulation  diameter≦2 fingertip | Yes（1 point） | No（0 point） |
| Acupoint  Location | Between the lateral end of the eyebrow and the outer canthus | Yes（1 point） | No（0 point） |
| In the depression of the infraorbital foramen | Yes（1 point） | No（0 point） |
| Strength  Effectiveness | Sense of sore (Qi) | Yes（1 point） | No（0 point） |
| Rhythm | One movement in a beat | Yes（1 point） | No（0 point） |
| Scrape  orbit | Manipulation | Manipulate with index finger | Yes（1 point） | No（0 point） |
| Manipulate with second phalangeal joint | Yes（1 point） | No（0 point） |
| Scrape bone | Yes（1 point） | No（0 point） |
| Acupoint  Location | On the bony structures of orbit | Yes（1 point） | No（0 point） |
| Strength  Effectiveness | Sense of sore (Qi) | Yes（1 point） | No（0 point） |
| Rhythm | One movement in 2 beat | Yes（1 point） | No（0 point） |

Supplementary Table 2: Parameter Estimation Results

|  | Group | UCVA | | | | SER | | | |
| --- | --- | --- | --- | --- | --- | --- | --- | --- | --- |
|  |  | Model 1 | | Model 2 | | Model 1 | | Model 2 | |
|  |  | *Β* (95% *CI*) | *P* Value | *Β* (95% *CI*) | *P* Value | *Β* (95% *CI*) | *P* Value | *Β* (95% *CI*) | *P* Value |
| Eye Exercise Quality | High-Quality | 0.004 (-0.10,0.10) | 0.934 | 0.00 (-0.10,0.10) | 0.993 | -0.33 (-0.86,0.20) | 0.226 | -0.31 (-0.85,0.22) | 0.249 |
| Time | T3 | 0.004 (-0.02,0.03) | 0.791 | 0.004 (-0.02,0.03) | 0.791 | -0.48 (-0.59, -0.37) | **<0.001*#** | -0.47 (-0.58,-0.36） | **<0.001*#** |
|  | T2 | -0.008 (-0.03,0.01) | 0.418 | -0.008 (0.01,-0.03) | 0.418 | -0.24 (-0.32,-0.16） | **<0.001*** | -0.24 (-0.32,-0.16) | **<0.001*** |

***Note.***T1 = baseline phase, T2 = the 3-month follow-up, T3 = the 9-month follow-up; Model 1: Unadjusted. Model 2: Adjusted for factors including student myopia, age, gender, parental education level, parental myopia count, average eye time, outdoor activity time, continuous eye use time, and uninterrupted outdoor activity time. Low-quality eye exercises and T1 are used as references; *Statistically significant differences compared to T1; #statistically significant differences compared to T2; UCVA = uncorrected visual acuity; SER = spherical equivalent refraction. Bold indicates statistical significance.
